# Supplementary material for: Aryl Hydrocarbon Receptor-Dependent and -Independent Pathways Mediate Curcumin Anti-Aging Effects
Source: MDPI journal article supplement (doi:10.3390/antiox11040613), 2022-03-23
Supplement: s1 [file s1]

# Aryl Hydrocarbon Receptor-Dependent and -Independent Pathways Mediate Curcumin Anti-Aging Effects

Vanessa Brinkmann <sup>1,2,†</sup>, Margherita Romeo <sup>1,2,†</sup>, Lucie Larigot <sup>3</sup>, Anne Hemmers <sup>2</sup>, Lisa Tschage <sup>2</sup>, Jennifer Kleinjohann <sup>2</sup>, Alfonso Schiavi <sup>1,2</sup>, Swantje Steinwachs <sup>2</sup>, Charlotte Esser <sup>2</sup>, Ralph Menzel <sup>4</sup>, Sara Giani Tagliabue <sup>5</sup>, Laura Bonati <sup>5</sup>, Fiona Cox <sup>1,6</sup>, Niloofar Ale-Agha <sup>1</sup>, Philipp Jakobs <sup>1</sup>, Joachim Altschmied <sup>1,2</sup>, Judith Haendeler <sup>1</sup>, Xavier Coumoul <sup>3</sup> and Natascia Ventura <sup>1,2,\*</sup>

<sup>1</sup> Institute of Clinical Chemistry and Laboratory Diagnostic, Medical Faculty, Heinrich Heine University, Düsseldorf, Moorenstr 5, 40225 Düsseldorf, Germany; vanessa.brinkmann@uni-duesseldorf.de (V.B.); margherita.romeo@iuf-duesseldorf.de (M.R.); alfonso.schiavi@uni-duesseldorf.de (A.S.); ficox100@uni-duesseldorf.de (F.C.); Niloofar.ALE-AGHA@uni-duesseldorf.de (N.A.-A.); philipp.jakobs@hhu.de (P.J.); joalt001@hhu.de (J.A.); juhae001@hhu.de (J.H.)

<sup>2</sup> IUF – Leibniz Research Institute for Environmental Medicine, Auf'm Hennekamp 50, 40225 Düsseldorf, Germany; anne.hemmers@hhu.de (A.H.); tschage@em.uni-frankfurt.de (L.T.); jenny.kleinjohann@web.de (J.K.); swantje.steinwachs@iuf-duesseldorf.de (S.S.); charlotte.esser@uni-duesseldorf.de (C.E.)

<sup>3</sup> Faculté des Sciences Fondamentales et Biomédicales, Université de Paris, 45 rue des Saints-Pères, F-75006 Paris, France; luciole271@gmail.com (L.L.); xavier.coumoul@parisdescartes.fr (X.C.)

<sup>4</sup> Institute of Biology, Humboldt-University Berlin, Philippstr. 13, 10115 Berlin, Germany; ralph.menzel@biologie.hu-berlin.de

<sup>5</sup> Department of Earth and Environmental Sciences, University of Milano-Bicocca, Piazza della Scienza 1, 20126 Milano, Italy; s.gianitagliabue@gmail.com (S.G.T.); laura.bonati@unimib.it (L.B.)

<sup>6</sup> Institute of Clinical Pharmacology and Pharmacology, Medical Faculty, University Hospital and Heinrich Heine University, Düsseldorf, Moorenstr 5, 40225 Düsseldorf, Germany

\* Correspondence: natascia.ventura@uni-duesseldorf.de, +49-211-3389203

† These authors contributed equally to this work.

Supplementary figures and tables

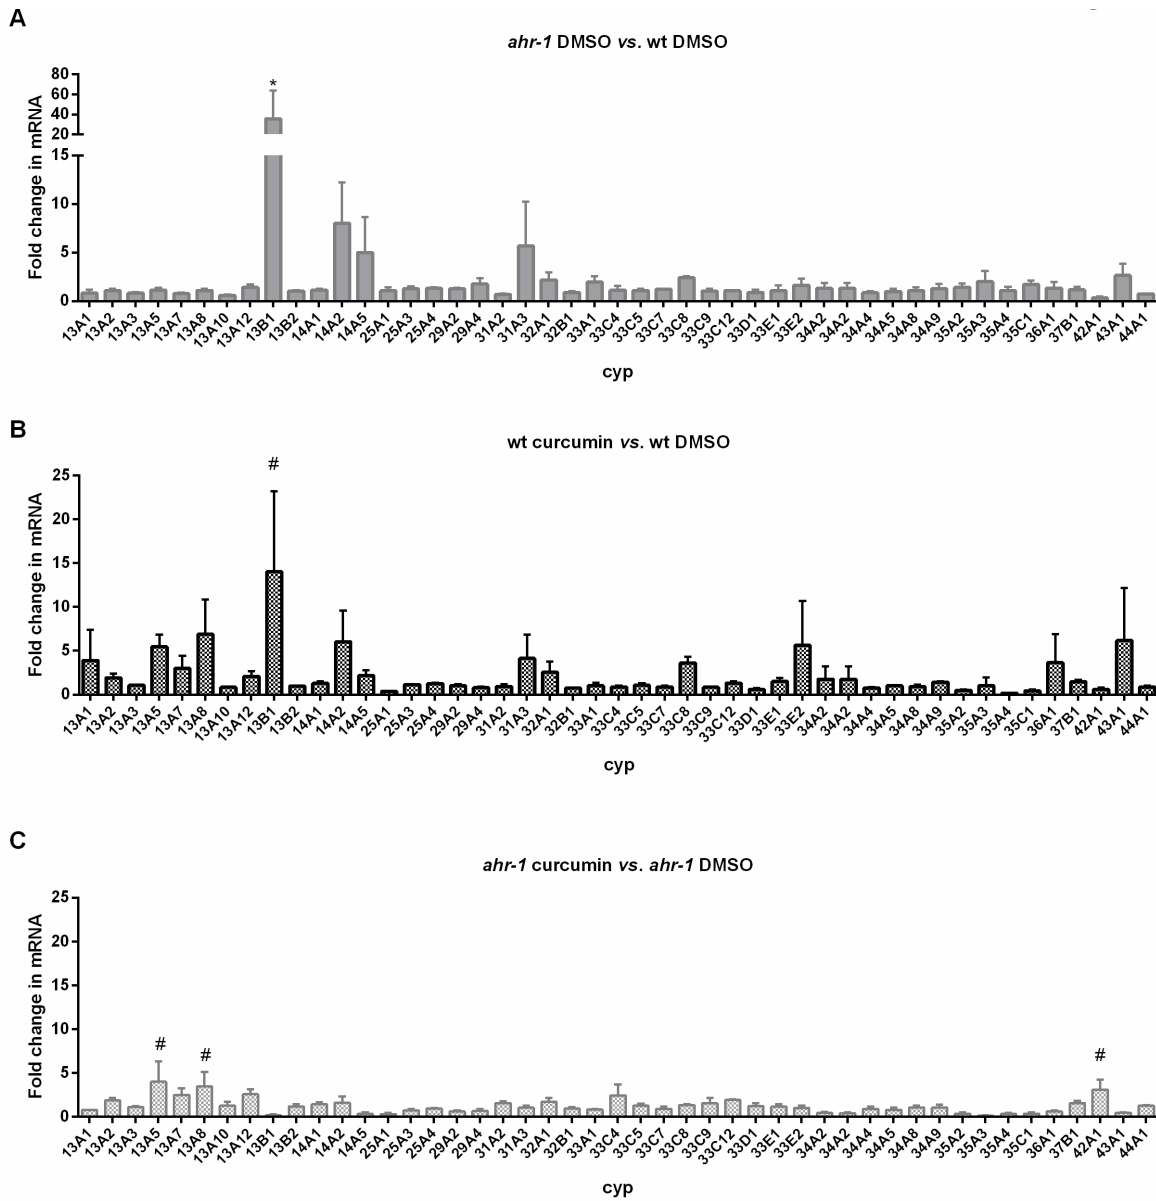

**Figure S1. *Cyp-13B1* expression is increased by curcumin in an *ahr-1*-dependent manner. A) *cyp* gene expression in DMSO-treated *ahr-1(ju145)* relative to DMSO-treated wild-type. B) *cyp* gene expression in curcumin-treated wild-type relative to DMSO-treated wild-type. C) *cyp* gene expression in curcumin-treated *ahr-1* mutants relative to DMSO-treated *ahr-1* mutants. Mean + SEM of pooled data from 3 replicates is shown in all panels. \* p-value < 0.05 vs. wt, # p-value < 0.05 vs. DMSO, statistical test: 2-way ANOVA with Tukey's multiple comparisons test.**

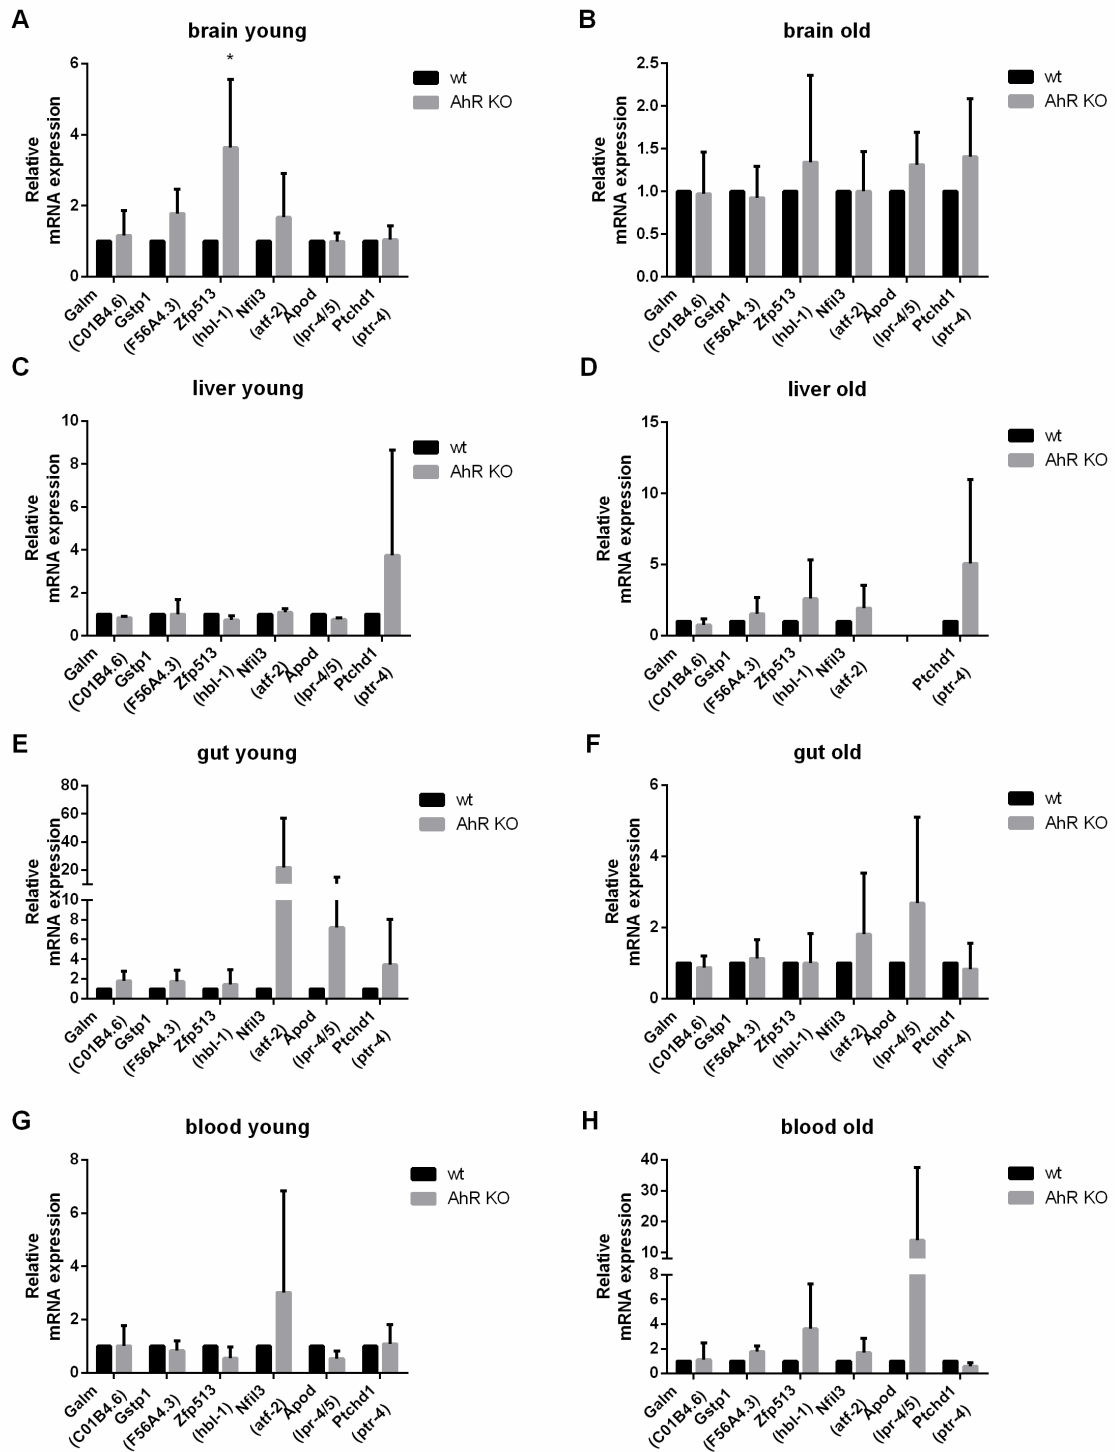

**Figure S2. Tissue-specific gene expression changes in mice.** Expression levels of homologs of some of the strongest differentially expressed genes between wt and *ahr-1* *C. elegans* in the brain (A-B), liver (C-D), gut (E-F), and blood (G-H) of young (8-12 weeks old) or old (18 months old) mice was assessed by qPCR. The *C. elegans* homolog names are indicated in brackets. Mean + SD of 3 mice is shown. Statistical test: 2-way ANOVA with Sidak's multiple comparisons test, \* p-value < 0.05 vs. wt.

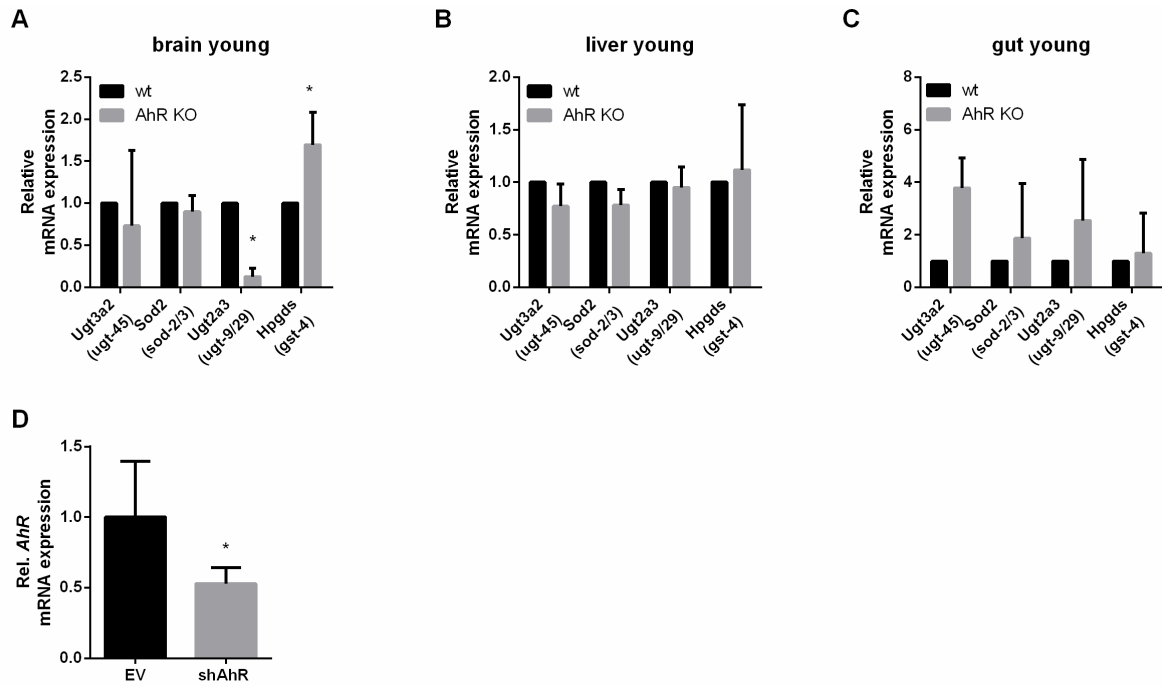

**Figure S3.** Genes coding for detoxification enzymes are differentially expressed in a tissue-specific manner in mice. qPCR analysis of *Ugt3A2*, *Sod2*, *Ugt2A3*, and *Hpdgs* expression in the brain (A), liver (B), and gut (C) young (8-12 weeks old) or old (18 months old) mice. Mean + SD of pooled data from 3 mice are shown. Statistical test: 2-way ANOVA with Sidak's multiple comparisons test, \* p-value < 0.05 vs. wt. D) Human primary EC were transfected with an empty vector (EV) or an expression vector for an shRNA targeting the human AhR transcript (shAhR). Relative *AhR* expression was assessed by qPCR, mean expression in the EV transfected cells was set to 1. Data are shown as mean + SD from 7 experiments. \*p<0.05 vs. EV.

**Table S1.** Primer pairs used for qPCR with *C. elegans* samples. Gene names are sorted alphabetically.

| Gene name        | Forward Primer sequence (5' – 3') | Reverse Primer sequence (5' – 3') | Efficiency (%) <sup>a</sup> | RefSeq mRNA ID |
|------------------|-----------------------------------|-----------------------------------|-----------------------------|----------------|
| <i>act-1</i>     | GCTCTTGCCCCATCAACCAT              | CACTTGCGGTGAACGATGGA              | 94.8-100.4                  | NM_073418      |
| <i>atf-2</i>     | CGAAGGAACAATGAAGCCGC              | CCAAGAGCTGAACTCGTCGT              | 98.1                        | NM_063460      |
| <i>C01B4.6</i>   | TGGCGATGCGAAAATTGATGTAA           | ATCTCCAGAAAGTGCTCGGC              | 83.9                        | NM_071283      |
| <i>C01B4.7</i>   | GTTTTGGAATCAGACGCGGG              | CAGTGGGGTTCCTCAAGTT               | 106.6                       | NM_071282      |
| <i>cdc-42</i>    | ATTACGCCGTCACAGTAATG              | ATCCCTGAGATCGACTTGAG              | 80.8-107.2                  | NM_063197      |
| <i>elec-209</i>  | TGCTCGGGGAACAACCAAAA              | TTGGCTACGAACGATTGATGC             | 88.4                        | NM_071249      |
| <i>cyp-13A1</i>  | GTACAACCTACACAAATCGC              | TGAATCTCTGGATGAGTTGC              | 91.2                        | NM_001383923   |
| <i>cyp-13A2</i>  | GTGGACAAAGAAATATGGCAA             | ACAAGTGAACCTCGTTGTTCT             | 97.6                        | NM_063708      |
| <i>cyp-13A3</i>  | GCCTGAAAGATGGGAATCTG              | TGCCAGAAGCATCTTTTCTT              | 100.5                       | NM_063709      |
| <i>cyp-13A5</i>  | TGGACAAAGAATACGGACC               | CGTAGGTGATGACAGAGTTC              | 86.7                        | NM_063711      |
| <i>cyp-13A7</i>  | GACAAAGAAATACGGACCTG              | TGCAGTTAATTTTCTCCCGT              | 93.2                        | NM_063713      |
| <i>cyp-13A8</i>  | AGCTCAAGTTTTAGATGGA               | CATAAGCTCCTGTGTGCTAT              | 94                          | NM_063714      |
| <i>cyp-13A10</i> | AAGACAGTGGATGGAATTA               | TCTCCGAATATCGCTCTGA               | 103.7                       | NM_063684      |
| <i>cyp-13A12</i> | CTGGGAGCTTTAGCAAATTC              | TCTCTGATTCCCATCTTTC               | 105.8                       | NM_067304      |
| <i>cyp-13B1</i>  | GGGCTGTTCCAGTGTTAGTC              | AACATCGTGAACCTGCTTTA              | 96.2                        | NM_077832      |
| <i>cyp-13B2</i>  | TGAGAATGTATCCAGTTGCC              | GATTCGAGCCATCTTTCTGG              | 98.7                        | NM_077968      |
| <i>cyp-14A1</i>  | TTCACCAGTCCCTCCAGAC               | AGAACGGTGAGCTCGGTAAG              | 94.4                        | NM_077802      |
| <i>cyp-14A2</i>  | AGTCCGGAAGGAAATACTTG              | CATCTCGGTTTGTATGAGTC              | 102.3                       | NM_077803      |
| <i>cyp-14A5</i>  | ATAGGCACGGCGAGACTACC              | CAAGTACAGTCTTGTTCAAC              | 100.1                       | NM_072034      |
| <i>cyp-25A1</i>  | TGGCTCTCCTGATTTAAGC               | AAGTTTTTCCTGCGTTCTG               | 84.7                        | NM_065374      |

|                  |                        |                                |       |              |
|------------------|------------------------|--------------------------------|-------|--------------|
| <i>cyp-25A2</i>  | CTCTTCTGATTCTCACCTCAA  | TTTTTCTTTCCGGTCAACGA           | 93.1  | NM_065375    |
| <i>cyp-25A3</i>  | AGCACTTCTTTCCTTTTCCC   | TAAACATCTGCAAGTCCCTC           | 109.2 | NM_001047385 |
| <i>cyp-25A4</i>  | CCAGTGTCTTTGATACTTCC   | ACCCTCTCCAGCACGTCTTC           | 106.4 | NM_065378    |
| <i>cyp-29A2</i>  | TGCCATAATTCTGGCATATC   | AGGACCAGGTAGTTTACTTC           | 90.3  | NM_073446    |
| <i>cyp-29A4</i>  | TTCCAGTGGCTCTTGCATTG   | CATCTTTCCTCCA-<br>TAAATCCAG    | 107.4 | NM_073089    |
| <i>cyp-31A2</i>  | CCGCTGTACTTCTCGCTATG   | TTCTTCATCTGCTCCGAGGC           | 84.3  | NM_069751    |
| <i>cyp-31A3</i>  | TACTCCGCCGATCTCGTG     | TTCTTCTCTGCTCCGAGGG            | 81.8  | NM_068236    |
| <i>cyp-32A1</i>  | TCCTAGCTGATGCAGTCGAG   | CCGTTCTTGGATGACCTTTC           | 94.6  | NM_072608    |
| <i>cyp-32B1</i>  | AGTTTTTGCATGTTTCGGAAG  | ACCATAACTTCAACACACCA           | 97.8  | NM_071197    |
| <i>cyp-33A1</i>  | GAAGTTAATATTCAGGAACAT  | TACGCGAAGTAGACACGAAG           | 100.6 | NM_072587    |
| <i>cyp-33C4</i>  | AAAATCTTCCCAGACCCCT    | GAAGACGGTGAGATCTT-<br>GTATCTA  | 107.2 | NM_071211    |
| <i>cyp-33C5</i>  | GTTTGTGTTTCTTCTGTTCCA  | CATATGGAATGTTGCCCATC           | 92.4  | NM_071215    |
| <i>cyp-33C7</i>  | GAAGATTGATGAAAGACTGGA  | CAGAGGTCCAAGCAAGTATT           | 97.3  | NM_071217    |
| <i>cyp-33C8</i>  | GATGATGTGCTCAACTACTG   | CTTGAGCCTTTTGCTTCTTC           | 111.6 | NM_071650    |
| <i>cyp-33C9</i>  | ATTTTCAAGCCGGAGAGATT   | CGGAACAACCCTGTATCTAT           | 111   | NM_071445    |
| <i>cyp-33C12</i> | ATATTGTCCCGATCAACCAG   | TGGGTCTGGGAAAACCTTAT           | 102.1 | NM_071198    |
| <i>cyp-33D1</i>  | CGTTTTGCAACAAACAACCTC  | CCAATGACTCTGTCTAGCTC           | 106.1 | NM_074675    |
| <i>cyp-33E1</i>  | CAATGCAACTGTTAATGAATCT | TCAGGGAATATCTCTGGATC           | 103.6 | NM_069079    |
| <i>cyp-33E2</i>  | ATGAATCACAACGCTCTTGCC  | TCAGGGAAGATTTCTGGATT           | 100.2 | NM_069069    |
| <i>cyp-34A2</i>  | TGTGCGTGTCTTCTCAATAA   | TTGGACTTCACTAATCACGG           | 86.4  | NM_074387    |
| <i>cyp-34A4</i>  | TGAACGATTTGAACAGGGTG   | TTCTCTGCACATTTCTTTGC           | 81.4  | NM_071696    |
| <i>cyp-34A5</i>  | AGTTGTAGAGAAGCTGAGGA   | GAACCTCATTAAACAACCGCA          | 98.9  | NM_071698    |
| <i>cyp-34A8</i>  | AGCTGTTTTTGATAACCGGAA  | GGAGCAAATGGAGTAGTTGT           | 109.3 | NM_071701    |
| <i>cyp-34A9</i>  | GCGCAACTATCAATGAAATCC  | TCAGCTCTAGCCAGTGATTC           | 87.6  | NM_001047606 |
| <i>cyp-35A2</i>  | TTCTGTGCTTTTGGGATACC   | TATTACCGTACCTCTTTCTA           | 79.6  | NM_072479    |
| <i>cyp-35A3</i>  | CGCTGCGTGTTAAGTTGGC    | TGTTGCCGATTTCTTTCTG            | 85.6  | NM_071720    |
| <i>cyp-35A4</i>  | TCGGCAATTTGAGTTGGTT    | TGTTGCCATATCTCTTTCTA           | 107.7 | NM_071723    |
| <i>cyp-35C1</i>  | GAGCCGAGCTGTATTTAATC   | ATGTGCAAGGCTTCGCATCT           | 97.4  | NM_171550    |
| <i>cyp-36A1</i>  | GATCGATTCTTGAATAGTCGTG | TCGTGATGCTCGGACTGTAA           | 79.8  | NM_059866    |
| <i>cyp-37B1</i>  | ATGTTTGAAGGCCACGACAC   | TCCGGGTTGTACTGATTTGG           | 89.8  | NM_074708    |
| <i>cyp-42A1</i>  | TCTACAACAGGCACGGAAGG   | TGTGTCGTGGCCTTCAAATG           | 122.2 | NM_075287    |
| <i>cyp-43A1</i>  | AGTCTGCTCGGATCTTTTT    | GTGCCGTAATTCCTCATAG            | 82.5  | NM_076560    |
| <i>cyp-44A1</i>  | ATCGGGAACATTGGGTATTT   | CAGTTTGAACATCAGCAGGA           | 81.5  | NM_062651    |
| <i>dyf-7</i>     | GTCTGCGTTTTCCGTCACAAG  | CGGGGAAGCAACAAGTTCTG           | 124.8 | NM_001392826 |
| <i>egl-46</i>    | CACCTCAACCGCTTTTCCAAG  | ATTTACATCCGCCTCTCTCC           | 85.1  | NM_072293    |
| <i>F56A4.3</i>   | ACGAGGGGAATGAATGGCAA   | CCATAGGGACCAA-<br>TATCCATGAACT | 101.4 | NM_071272    |
| <i>K04H4.2</i>   | ACGCCGGAATCTGTTGTTCT   | CGTTCATTT-<br>GGAAAGGAGGCAT    | 95.3  | NM_001382959 |
| <i>ptr-4</i>     | TCCTACCAGACGCGCAATC    | GCAACCCATACTGACGGAGT           | 79.5  | NM_076612    |
| <i>T20F5.4</i>   | TCATCTACCGAGCAGCCAAC   | GAGATGCTCGGTCTCACTGC           | 94.5  | NM_058862    |
| <i>ugt-9</i>     | ATGTTGCCAATAATTTGCT    | TGGTTGGAAGACTGTAACAT           | 100.2 | NM_071911    |
| <i>ugt-29</i>    | GATGGTGACTAAGGAAATCAAC | CCGATTTTACCAGTGATCCA           | 102.8 | NM_001383270 |
| <i>ugt-45</i>    | GAAATTCGGGTTCAAGTCAACA | TTAATAGCGTCGGTAGTCGG           | 88    | NM_068009    |
| <i>ugt-57</i>    | CCTTGTCCGTGAGAAAGTTA   | TCCGTCAATCCTTCCGTAT            | 101.1 | NM_076781    |

<sup>a</sup> Primer efficiency is defined as how many copies of PCR product are produced per cycle. In ideal conditions, the primer efficiency is 100%, meaning that the amount of PCR product is doubled with each cycle. The primer efficiency was used for the calculation of the expression levels.



**Table S2.** Primer pairs used for qPCR with mouse samples.

| Gene name     | Forward Primer sequence<br>(5' – 3') | Reverse Primer sequence<br>(5' – 3') | Efficiency<br>(%) <sup>a</sup> | RefSeq mRNA<br>ID |
|---------------|--------------------------------------|--------------------------------------|--------------------------------|-------------------|
| <i>Ugt3a2</i> | GTGTGTCGCAAGTTCTTCAT                 | TGATGTTTGGACCTGCCATA                 | 94.7                           | NM_144845.3       |
| <i>Hpgds</i>  | CAGCGTTGGAGCAATGTCAA                 | CTGCCCAGGTTACATAATTGC                | 109.9                          | NM_019455.4       |
| <i>Ugt2a3</i> | TATAGACCCTGTCGTTCCCTGT               | TTGTGGGCCTTCCTAGGGTT                 | 92.6                           | NM_028094.3       |
| <i>Sod2</i>   | AACGCCACCGAGGAGAAGTA                 | TCCAGCAACTCTCCTTTGGGT                | 102.2                          | NM_013671.3       |
| <i>Galm</i>   | AAGGAACTGCCTTCGACCTG                 | GACGCACCCTTGCACAAAAC                 | 111.0                          | NM_176963.4       |
| <i>Gstp1</i>  | TGAGTACCCCTCTGTCTACGC                | AGCTGCCCATACAGA-<br>CAAGTG           | 96.4                           | NM_013541.1       |
| <i>Zfp513</i> | GGGAGGGAGATTCCACAAGC                 | CCCCTGAGAGTCTCCTTCAGA                | 146.9                          | NM_001177901.1    |
| <i>Nfil3</i>  | CAGGGAGCAGAACCACGATAAC               | CCTCGTCCTACAGACCGGAT                 | 89.9                           | NM_017373.3       |
| <i>Apod</i>   | ATCTGAGAGAAACTGACAG-<br>TGAGC        | GAGACGGGCATTTCCCAAGA                 | 108.8                          | NM_007470.4       |
| <i>Ptchd1</i> | CCCTTTCGTCATGCTAGGTCAT               | GCCGAAGGTGACCAAGTACA                 | 123.2                          | NM_001093750.1    |

<sup>a</sup>Primer efficiency is defined as how many copies of PCR product are produced per cycle. In ideal conditions, the primer efficiency is 100%, meaning that the amount of PCR product is doubled with each cycle.
